# Supplementary material for: Sustainable PHBH–Alumina Nanowire Nanocomposites: Properties and Life Cycle Assessment
Source: MDPI journal article supplement (doi:10.3390/polym14225033), 2022-11-20
Supplement: s1 [file s1]

# Sustainable PHBH–Alumina Nanowire Nanocomposites: Properties and Life Cycle Assessment

Julen Ibarretxe <sup>1</sup>, Laura Alonso <sup>2</sup>, Nora Aranburu <sup>3</sup>, Gonzalo Guerrica-Echevarría <sup>3</sup>, Amaia Orbea <sup>4</sup> and Maider Iturrondobeitia <sup>1,2,\*</sup>

<sup>1</sup> eMERG Research Group, School of Engineering of Bilbao, Building II-I, University of the Basque Country (UPV/EHU), Rafael Moreno Pitxitxi 3, 48013 Bilbao, Spain

<sup>2</sup> Life Cycle Thinking Group, Department of Graphic Design and Engineering Projects, University of the Basque Country (UPV/EHU), Plaza Ingeniero Torres Quevedo 1, 48013 Bilbao, Spain

<sup>3</sup> POLYMAT and Department of Polymer and Advanced Materials: Physics, Chemistry and Technology, Faculty of Chemistry, University of the Basque Country UPV/EHU, Paseo Manuel de Lardizabal 3, 20018 Donostia-San Sebastián, Spain

<sup>4</sup> CBET Research Group, Dept. of Zoology and Animal Cell Biology, Research Centre for Experimental Marine Biology and Biotechnology PiE and Science and Technology Faculty, University of the Basque Country (UPV/EHU). Sarriena z/g, 48940 Leioa, Spain

\* Correspondence: maider.iturrondobeitia@ehu.eus; Tel.: +34-946014311

## S1. TGA curves

Figures S1 and S2 show the TGA curves of the samples prepared by melt blending and solvent casting, respectively.

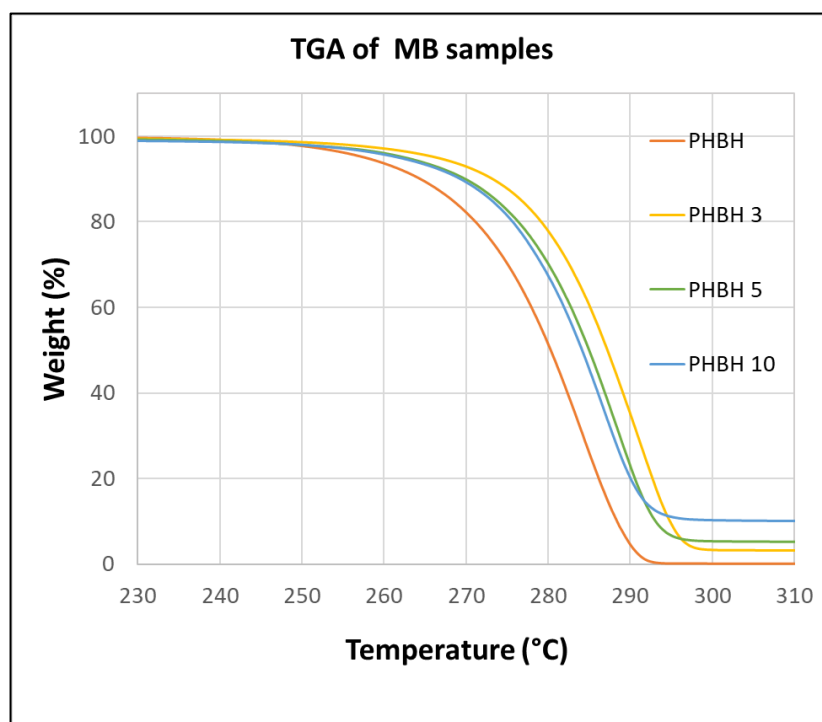

Figure S1. TGA curves of the samples prepared by melt blending.

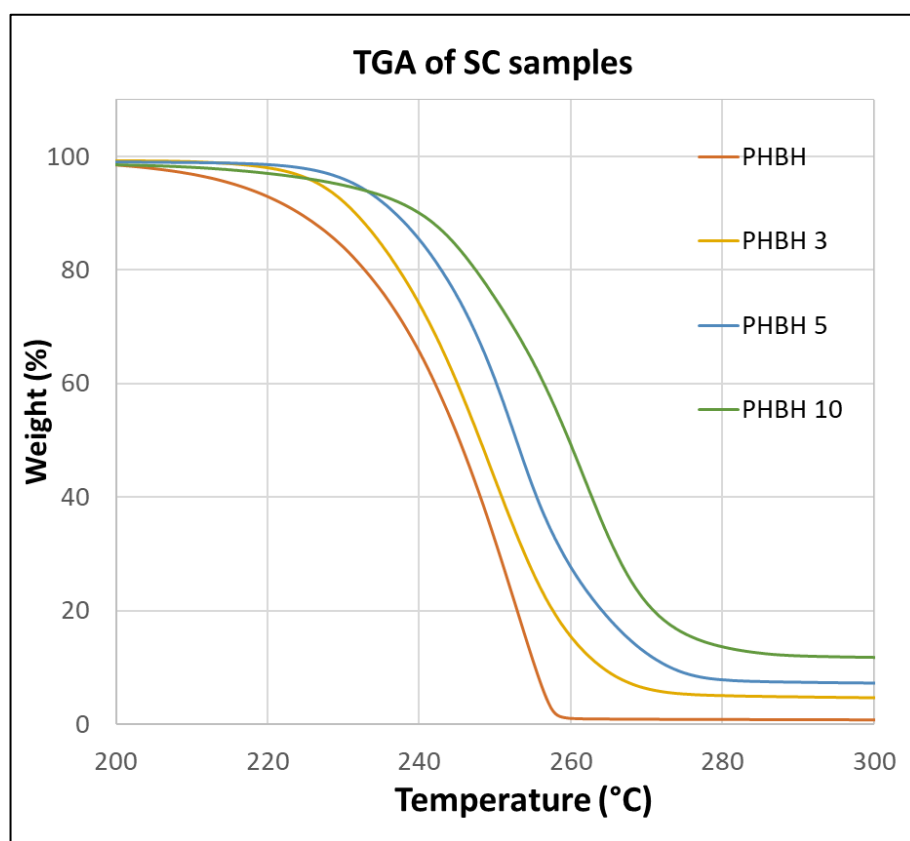

Figure S2. TGA curves of the samples prepared by solvent casting.

## S2. Tensile test curves

Figure S3. shows the tensile test curves of the samples prepared by solvent casting.

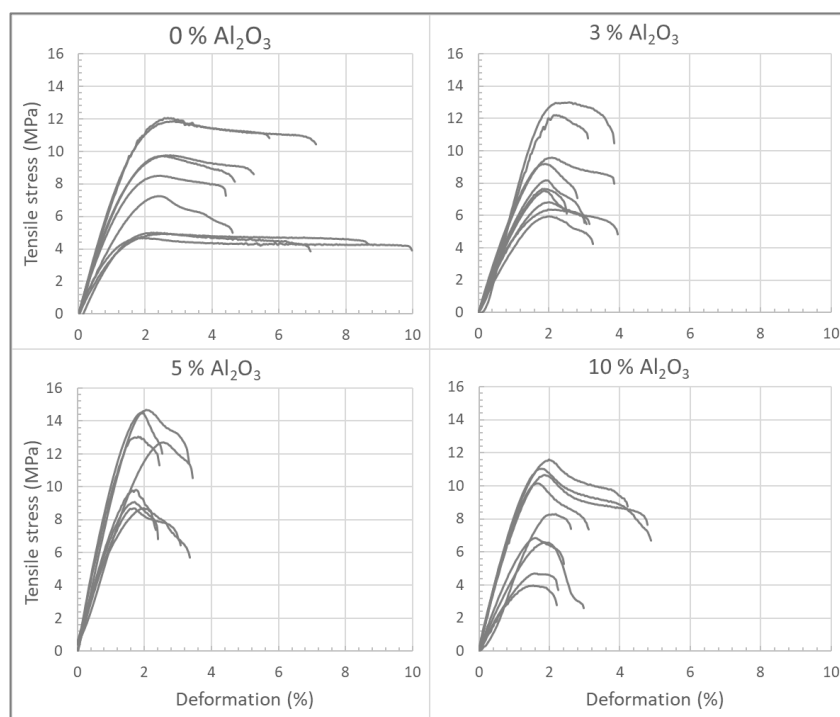

Figure S3. Tensile test curves of the samples prepared by solvent casting.

### S3. Inventory tables

The functional unit is *the use of 1 Kg of polymer from production to processing, use and end of Life (EoL)*. Cradle to Grave boundaries are used.

The studied cases are the following:

- a- PHBH polymer: production, processing by melt blending and EoL composting.
- b- PHBH polymer: production, processing by melt blending and EoL biodegradation in sea water.
- c- Petrol based Polyamide (PA) production, processing by melt blending and processing and Landfill EoL.
- d- PHBH polymer: production, processing by melt blending, EoL biodegradation in sea water.
- e- PHBH polymer: production, processing by solvent casting, EoL biodegradation in sea water.

All the inventories are summarized in the following Tables S3.1-4.

Table S1. Modelling for the life cycle materials and energy flows for the production of 1 kg of polyhydroxybutyrate "PHB", (own source).

| Item                                                      | Amount | Unit | Source/provider                                                                                                                              |
|-----------------------------------------------------------|--------|------|----------------------------------------------------------------------------------------------------------------------------------------------|
| Input                                                     |        |      |                                                                                                                                              |
| E                                                         | 2.29   | kWh  | Own source                                                                                                                                   |
| enzymes                                                   | 0.47   | kg   | Enzymes production   enzymes   Cut-off, U - RER                                                                                              |
| Glycerol_98                                               | 17.0   | kg   | Elementary   glycerol                                                                                                                        |
| Hydrochloric acid, without water, in 30% solution state   | 0.46   | kg   | Allyl chloride production, reaction of propylene and chlorine   hydrochloric acid, without water, in 30% solution state   Cut-off, U - RER   |
| Hydrogen peroxide, without water, in 50% solution state   | 1.24   | kg   | Hydrogen peroxide production, product in 50% solution state   hydrogen peroxide, without water, in 50% solution state   Cut-off, U - RER     |
| Sodium hypochlorite, without water, in 15% solution state | 0.23   | kg   | Sodium hypochlorite production, product in 15% solution state   sodium hypochlorite, without water, in 15% solution state   Cut-off, U - RER |
| Tap water                                                 | 28.8   | kg   | Market for tap water   tap water   Cut-off, U - Europe without Switzerland                                                                   |
| Output                                                    |        |      |                                                                                                                                              |
| PHB                                                       | 1.0    | kg   |                                                                                                                                              |
| Methanol, from biomass                                    | 0.58   | kg   | Manufacture of coke and refined petroleum products/19a: Liquid and gaseous fuels from biomass                                                |

|                     |       |    |                                                                                                                                                                                                           |
|---------------------|-------|----|-----------------------------------------------------------------------------------------------------------------------------------------------------------------------------------------------------------|
| Sodium methoxide    | 0.56  | kg | Manufacture of chemicals and chemical products/201:Manufacture of basic chemicals, fertilizers and nitrogen compounds, plastics and synthetic rubber in primary forms/2011:Manufacture of basic chemicals |
| Solid_waste         | 0.132 | kg | Landfill of solid waste, at landfill site, landfill including landfill gas utilisation and leachate treatment                                                                                             |
| Wastewater, average | 13.0  | m3 | Water supply; sewerage, waste management and remediation activities/37:Sewerage/370:Sewerage/3700:Sewerage                                                                                                |
| Water vapour        | 25.0  | kg | Elementary flows/Emission to air/high population density                                                                                                                                                  |

The energy required (named E) for all the processes has been calculated according to the existing processes available in ecoinvent 3.8 for the production of the petrochemical based conventional polymers (PP, PA, PET and PE) and the landfill processes which is an average of:

|                                    |                                     |
|------------------------------------|-------------------------------------|
| Energy, primary, from geothermal   | Elementary flows/Resource/in ground |
| Energy, primary, from solar energy | Elementary flows/Resource/in air    |
| Energy, primary, from water power  | Elementary flows/Resource/in water  |
| Energy, primary, from wind power   | Elementary flows/Resource/in air    |

Table S2. Modelling for the life cycle materials and energy flows for the production –process and EoL- landfill of 1 kg of petroleum based PA.

| Item                                              | Amount | Unit | Source/provider                                                                                                                     |
|---------------------------------------------------|--------|------|-------------------------------------------------------------------------------------------------------------------------------------|
| Input                                             |        |      |                                                                                                                                     |
| POLYMER                                           | 2      | kg   | Nylon 66 granulate (PA 66), production mix, at plant                                                                                |
| E                                                 | 33.8   | kWh  | Own source                                                                                                                          |
| Transport, freight, lorry 16-32 metric ton, EURO5 | 38.18  | t*km | Market for transport, freight, lorry 16-32 metric ton, EURO5   transport, freight, lorry 16-32 metric ton, EURO5   Cut-off, U - RoW |
| Output                                            |        |      |                                                                                                                                     |

| Flow                      | Amount | Unit | Provider                                                                                                                                                                                                                                        |
|---------------------------|--------|------|-------------------------------------------------------------------------------------------------------------------------------------------------------------------------------------------------------------------------------------------------|
| Waste plastic             | 0.5    | kg   | Landfill of plastic waste, at landfill site, landfill including landfill gas utilisation and leachate treatment                                                                                                                                 |
| Polypropylene fibres (PP) | 0.5    | kg   | Material Landfill of plastic waste, at landfill site, landfill including landfill gas utilisation and leachate treatment and production/Plastics                                                                                                |
| Landfill                  | 1      | Kg   | Landfill of plastic waste, at landfill site, landfill including landfill gas utilisation and leachate treatment + process-specific burdens, residual material landfill   process-specific burdens, residual material landfill   Cutoff, U - RoW |

Table S3. Modelling for the life cycle materials and energy flows for the production –process and EoL- compost of 1 kg of PHB.

| Item                                              | Amount | Unit | Source/provider                                                                                                                     |
|---------------------------------------------------|--------|------|-------------------------------------------------------------------------------------------------------------------------------------|
| Input                                             |        |      |                                                                                                                                     |
| POLYMER                                           | 2      | kg   | PHB from table S6 (own source)                                                                                                      |
| E                                                 | 33.8   | kWh  | Own source                                                                                                                          |
| Transport, freight, lorry 16-32 metric ton, EURO5 | 38.18  | t*km | Market for transport, freight, lorry 16-32 metric ton, EURO5   transport, freight, lorry 16-32 metric ton, EURO5   Cut-off, U - RoW |
| Land-compost                                      | 120    | kg   | Elementary flows/Land use/Land occupation                                                                                           |
| Oxygen                                            | 1      | Kg   | Elementary flows/Oxygen                                                                                                             |
| Output                                            |        |      |                                                                                                                                     |
| Flow                                              | Amount | Unit | Provider                                                                                                                            |
| Waste plastic                                     | 0.5    | kg   | Landfill of plastic waste, at landfill site, landfill including landfill gas utilisation and leachate treatment                     |
| Carbon dioxide, biogenic                          | 1.7    | g    | Elementary flows/Emission to air/low population density, long-term                                                                  |
| Compost at plant                                  | 0.8    | g    | Compost at plant / GLO                                                                                                              |

Table S4. Modelling for the life cycle materials and energy flows for the production –process and EoL- biodegradation in sea water of 1 kg of PHB.

| Item                                              | Amount | Unit | Source/provider                                                                                                                     |
|---------------------------------------------------|--------|------|-------------------------------------------------------------------------------------------------------------------------------------|
| Input                                             |        |      |                                                                                                                                     |
| POLYMER                                           | 2      | kg   | PHB from table S6 (own source)                                                                                                      |
| E                                                 | 33.8   | kWh  | Own source                                                                                                                          |
| Transport, freight, lorry 16-32 metric ton, EURO5 | 38.18  | t*km | Market for transport, freight, lorry 16-32 metric ton, EURO5   transport, freight, lorry 16-32 metric ton, EURO5   Cut-off, U - RoW |
| Output                                            |        |      |                                                                                                                                     |
| Flow                                              | Amount | Unit | Provider                                                                                                                            |
| Waste plastic                                     | 0.5    | kg   | Landfill of plastic waste, at landfill site, landfill including landfill gas utilisation and leachate treatment                     |
| Carbon dioxide, biogenic                          | 1.2    | g    | Elementary flows/Emission to air/low population density, long-term                                                                  |
| Water                                             | 0,3    | g    | Elementary flows/Emission                                                                                                           |

#### S4. Environmental impact assessment

Table S5. Results of the quantified environmental impacts for all the studied cases “a, b, c, d, e, and f” of 1 kg of PHB.

| Indicator                                                   | PHB-sea degradation | PHB-compost | PA-landfill | PE-landfill | PP-landfill | PET-landfill |
|-------------------------------------------------------------|---------------------|-------------|-------------|-------------|-------------|--------------|
| Fine particulate matter formation (kg PM <sub>2,5</sub> eq) | 2.95E-03            | 2.95E-03    | 3.06E-02    | 1.36E-02    | 1.60E-02    | 1.56E-02     |
| Fossil resource scarcity (kg oil eq)                        | 4.65E-01            | 4.65E-01    | 4.44E-02    | 4.44E-02    | 1.75E+00    | 4.44E-02     |
| Freshwater ecotoxicity (kg 1,4-DCB)                         | 7.06E-02            | 7.06E-02    | 3.66E-01    | 3.64E-01    | 4.17E-01    | 3.65E-01     |
| Freshwater eutrophication (kg P eq)                         | 6.00E-04            | 6.00E-04    | 4.23E-04    | 3.96E-04    | 8.20E-04    | 3.96E-04     |
| Global warming (kg CO <sub>2</sub> eq)                      | 1.66E+00            | 1.66E+00    | 2.45E+01    | 9.81E+00    | 1.13E+01    | 1.09E+01     |
| Human carcinogenic                                          | 7.36E+00            | 7.36E+00    | 6.11E+02    | 6.11E+02    | 6.17E+02    | 6.11E+02     |

|                                                                 |           |           |          |          |          |          |
|-----------------------------------------------------------------|-----------|-----------|----------|----------|----------|----------|
| toxicity (kg 1,4-DCB)                                           |           |           |          |          |          |          |
| Human non-carcinogenic toxicity (kg 1,4-DCB)                    | 2.98E+02  | 2.98E+02  | 2.21E+03 | 2.16E+03 | 2.39E+03 | 2.16E+03 |
| Ionizing radiation (kBq Co-60 eq)                               | 1.72E-01  | 1.72E-01  | 4.94E+00 | 1.91E+00 | 1.96E+00 | 1.91E+00 |
| Land use (m <sup>2</sup> a crop eq)                             | 3.05E-03  | 1.30E-01  | 1.21E-02 | 1.21E-02 | 2.75E-02 | 1.21E-02 |
| Marine ecotoxicity (kg 1,4-DCB)                                 | 3.79E+02  | 3.79E+02  | 3.27E+03 | 3.21E+03 | 3.50E+03 | 3.21E+03 |
| Marine eutrophication (kg N eq)                                 | 5.50E-05  | 5.50E-05  | 5.65E-04 | 2.71E-04 | 3.04E-04 | 2.71E-04 |
| Mineral resource scarcity (kg Cu eq)                            | 5.50E-03  | 5.50E-03  | 6.93E-03 | 5.72E-03 | 1.18E-02 | 5.72E-03 |
| Ozone formation, Human health (kg NO <sub>x</sub> eq)           | 3.64E-03  | 3.64E-03  | 3.29E-02 | 2.07E-02 | 2.51E-02 | 2.15E-02 |
| Ozone formation, Terrestrial ecosystems (kg NO <sub>x</sub> eq) | 3.68E-03  | 3.68E-03  | 3.37E-02 | 2.08E-02 | 2.56E-02 | 2.21E-02 |
| Stratospheric ozone depletion (kg CFC11 eq)                     | 1.32E+00  | 1.32E+00  | 4.78E-05 | 2.04E-06 | 2.49E-06 | 2.04E-06 |
| Terrestrial acidification (kg SO <sub>2</sub> eq)               | 5.70E-03  | 5.70E-03  | 1.02E-01 | 4.61E-02 | 5.24E-02 | 5.29E-02 |
| Terrestrial ecotoxicity (kg 1,4-DCB)                            | 4.37E+00  | 4.37E+00  | 1.04E+01 | 5.20E+00 | 6.95E+00 | 6.45E+00 |
| Water consumption (m <sup>3</sup> )                             | -4.73E-01 | -4.73E-01 | 3.05E-02 | 9.51E-03 | 3.42E-02 | 4.16E-02 |

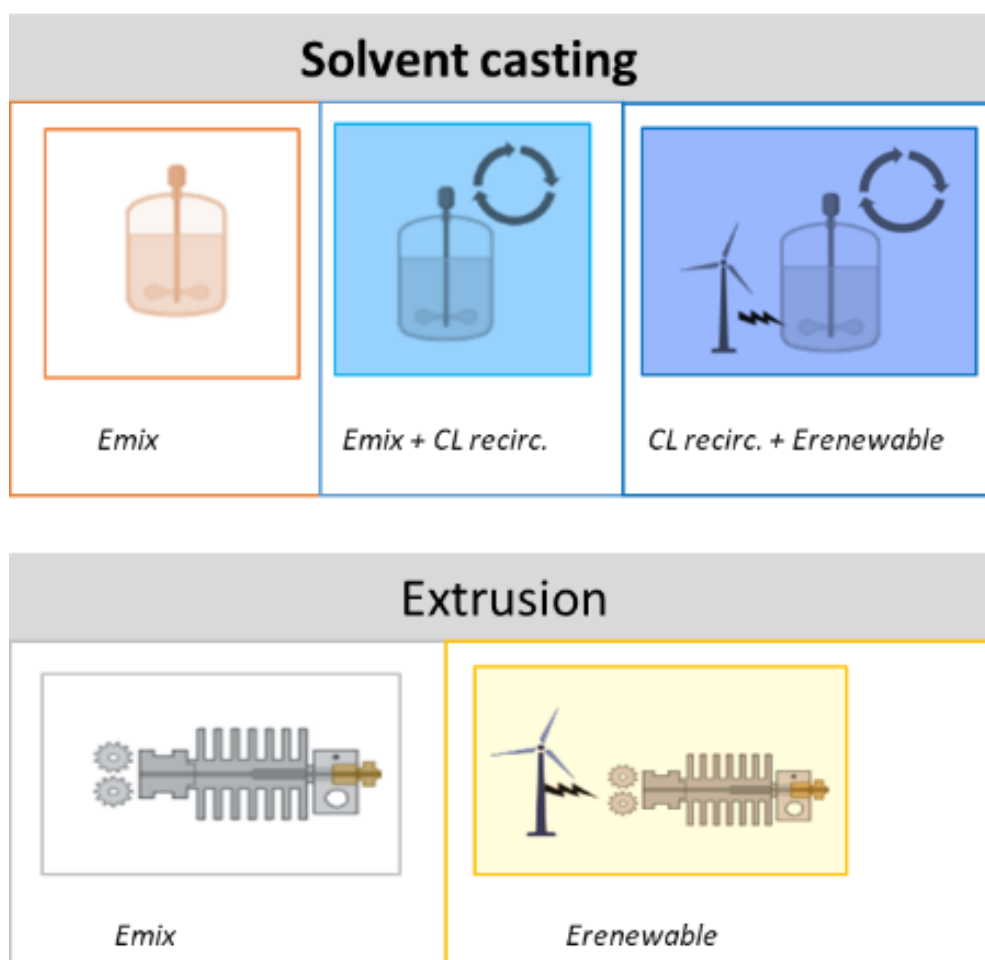

Figure S4. Visual summary of the sensitivity analysis to measure the effects of the type of energy sources and waste recirculation processes. *CL* stands for chloroform, which is the solvent used for the solvent casting processing technique.

| Indicator                         | b-PHBH-sea water | a-PHBH-compost | c- PA-landfill | d- PHBH-alumina-extrusion | e- PHBH-alumina-solventAA | Unit        |
|-----------------------------------|------------------|----------------|----------------|---------------------------|---------------------------|-------------|
| Fine particulate matter formation | 0.01             | 0.01           | 2.29           | 0.01                      | 0.10                      | kg PM2,5 eq |
| Fossil resource scarcity          | 1.38             | 1.38           | 0.00           | 1.39                      | 31.74                     | kg oil eq   |
| Freshwater ecotoxicity            | 0.14             | 0.14           | 0.15           | 0.14                      | 2.79                      | kg 1,4-DCB  |
| Freshwater eutrophication         | 0.00             | 0.00           | 0.02           | 0.00                      | 0.02                      | kg P eq     |
| Global warming                    | 4.77             | 4.84           | 1512.84        | 4.84                      | 47.76                     | kg CO2 eq   |
| Human carcinogenic toxicity       | 15.36            | 15.36          | 1.65           | 15.51                     | 259.28                    | kg 1,4-DCB  |



|                                         |        |        |         |        |          |              |
|-----------------------------------------|--------|--------|---------|--------|----------|--------------|
| Human non-carcinogenic toxicity         | 612.13 | 612.30 | 2290.80 | 651.08 | 9684.81  | kg 1,4-DCB   |
| Ionizing radiation                      | 0.45   | 0.48   | 325.68  | 0.48   | 7.72     | kBq Co-60 eq |
| Land use                                | 0.06   | 0.26   | 0.00    | 0.07   | 0.94     | m2a crop eq  |
| Marine ecotoxicity                      | 777.64 | 777.87 | 3055.43 | 826.20 | 12391.30 | kg 1,4-DCB   |
| Marine eutrophication                   | 0.00   | 0.00   | 0.03    | 0.00   | 0.00     | kg N eq      |
| Mineral resource scarcity               | 0.01   | 0.01   | 0.52    | 0.01   | 0.20     | kg Cu eq     |
| Ozone formation, Human health           | 0.01   | 0.01   | 3.40    | 0.01   | 1.11     | kg NOx eq    |
| Ozone formation, Terrestrial ecosystems | 0.01   | 0.01   | 3.41    | 0.01   | 1.72     | kg NOx eq    |
| Stratospheric ozone depletion           | 0.00   | 0.00   | 0.00    | 0.00   | 0.00     | kg CFC11 eq  |
| Terrestrial acidification               | 0.01   | 0.01   | 7.82    | 0.01   | 0.19     | kg SO2 eq    |
| Terrestrial ecotoxicity                 | 9.02   | 9.05   | 923.25  | 8.58   | 3827.86  | kg 1,4-DCB   |
| Water consumption                       | -0.95  | -0.95  | 2.12    | -0.83  | 0.34     | m3           |

Table S6. Environmental impact results of the sensitivity analysis to measure the effects of energy sources and waste recirculation processes.

| Indicator                                       | Solvent Recovery CL | Solvent PHB | Extrusion PHB | Extrusion-renewable energy from wind | Solvent REcoveryCL + renewable energy |
|-------------------------------------------------|---------------------|-------------|---------------|--------------------------------------|---------------------------------------|
| Fine particulate matter formation (kg PM2,5 eq) | 0.025               | 0.099       | 0.007         | 0.005                                | 0.023                                 |
| Fossil resource scarcity (kg oil eq)            | 6.390               | 31.300      | 0.989         | 0.849                                | 6.190                                 |
| Freshwater ecotoxicity (kg 1,4-DCB)             | 0.548               | 2.790       | 0.143         | 0.132                                | 0.534                                 |
| Freshwater eutrophication (kg P eq)             | 0.005               | 0.018       | 0.001         | 0.001                                | 0.004                                 |
| Global warming (kg CO2 eq)                      | 11.9                | 46.5        | 3.5           | 3.0                                  | 11.2                                  |
| Human carcinogenic toxicity (kg 1,4-DCB)        | 61.0                | 259.0       | 14.9          | 13.3                                 | 58.1                                  |

|                                                     |          |          |          |          |          |
|-----------------------------------------------------|----------|----------|----------|----------|----------|
| Human non-carcinogenic toxicity (kg 1,4-DCB)        | 2260.0   | 9670.0   | 637.0    | 573.0    | 2170.0   |
| Ionizing radiation (kBq Co-60 eq)                   | 2.920    | 7.620    | 0.377    | 0.315    | 2.330    |
| Land use (m2a crop eq)                              | 0.238    | 0.940    | 0.066    | 0.058    | 0.223    |
| Marine ecotoxicity (kg 1,4-DCB)                     | 2890.0   | 12400.0  | 808.0    | 726.0    | 2780.0   |
| Marine eutrophication (kg N eq)                     | 0.000360 | 0.001260 | 0.000136 | 0.000120 | 0.000332 |
| Mineral resource scarcity (kg Cu eq)                | 0.043    | 0.196    | 0.010    | 0.010    | 0.042    |
| Ozone formation, Human health (kg NOx eq)           | 0.033    | 1.110    | 0.008    | 0.007    | 0.031    |
| Ozone formation, Terrestrial ecosystems (kg NOx eq) | 0.035    | 1.720    | 0.008    | 0.007    | 0.032    |
| Stratospheric ozone depletion (kg CFC11 eq)         | 0.000009 | 0.000036 | 0.000003 | 0.000002 | 0.000009 |
| Terrestrial acidification (kg SO2 eq)               | 0.050    | 0.187    | 0.012    | 0.010    | 0.046    |
| Terrestrial ecotoxicity (kg 1,4-DCB)                | 20.900   | 3830.000 | 8.320    | 8.010    | 20.400   |
| Water consumption (m3)                              | -0.642   | 0.336    | -0.831   | -0.833   | -0.646   |

| Indicator                                       | Solvent Recovery CL | Solvent PHB | Extrusion PHB | Extrusion-renewable energy from wind | Solvent REcoveryCL + renewable energy |
|-------------------------------------------------|---------------------|-------------|---------------|--------------------------------------|---------------------------------------|
| Fine particulate matter formation (kg PM2,5 eq) | 2.49E-02            | 9.91E-02    | 6.55E-03      | 5.36E-03                             | 2.32E-02                              |
| Fossil resource scarcity (kg oil eq)            | 6.39E+00            | 3.13E+01    | 9.89E-01      | 8.49E-01                             | 6.19E+00                              |
| Freshwater ecotoxicity (kg 1,4-DCB)             | 5.48E-01            | 2.79E+00    | 1.43E-01      | 1.32E-01                             | 5.34E-01                              |
| Freshwater eutrophication (kg P eq)             | 4.55E-03            | 1.79E-02    | 1.32E-03      | 1.09E-03                             | 4.26E-03                              |

|                                                                          |           |          |           |           |           |
|--------------------------------------------------------------------------|-----------|----------|-----------|-----------|-----------|
| Global warming<br>(kg CO <sub>2</sub> eq)                                | 1.19E+01  | 4.65E+01 | 3.53E+00  | 3.03E+00  | 1.12E+01  |
| Human<br>carcinogenic<br>toxicity (kg 1,4-<br>DCB)                       | 6.10E+01  | 2.59E+02 | 1.49E+01  | 1.33E+01  | 5.81E+01  |
| Human non-<br>carcinogenic<br>toxicity (kg 1,4-<br>DCB)                  | 2.26E+03  | 9.67E+03 | 6.37E+02  | 5.73E+02  | 2.17E+03  |
| Ionizing radiation<br>(kBq Co-60 eq)                                     | 2.92E+00  | 7.62E+00 | 3.77E-01  | 3.15E-01  | 2.33E+00  |
| Land use (m <sup>2</sup> a<br>crop eq)                                   | 2.38E-01  | 9.40E-01 | 6.64E-02  | 5.83E-02  | 2.23E-01  |
| Marine ecotoxicity<br>(kg 1,4-DCB)                                       | 2.89E+03  | 1.24E+04 | 8.08E+02  | 7.26E+02  | 2.78E+03  |
| Marine<br>eutrophication (kg<br>N eq)                                    | 3.60E-04  | 1.26E-03 | 1.36E-04  | 1.20E-04  | 3.32E-04  |
| Mineral resource<br>scarcity (kg Cu<br>eq)                               | 4.31E-02  | 1.96E-01 | 1.02E-02  | 9.95E-03  | 4.22E-02  |
| Ozone formation,<br>Human health (kg<br>NO <sub>x</sub> eq)              | 3.30E-02  | 1.11E+00 | 7.85E-03  | 6.62E-03  | 3.06E-02  |
| Ozone formation,<br>Terrestrial<br>ecosystems (kg<br>NO <sub>x</sub> eq) | 3.46E-02  | 1.72E+00 | 7.95E-03  | 6.71E-03  | 3.22E-02  |
| Stratospheric<br>ozone depletion<br>(kg CFC11 eq)                        | 9.08E-06  | 3.58E-05 | 2.69E-06  | 2.41E-06  | 8.61E-06  |
| Terrestrial<br>acidification (kg<br>SO <sub>2</sub> eq)                  | 4.99E-02  | 1.87E-01 | 1.22E-02  | 1.04E-02  | 4.55E-02  |
| Terrestrial<br>ecotoxicity<br>(kg 1,4-DCB)                               | 2.09E+01  | 3.83E+03 | 8.32E+00  | 8.01E+00  | 2.04E+01  |
| Water<br>consumption (m <sup>3</sup> )                                   | -6.42E-01 | 3.36E-01 | -8.31E-01 | -8.33E-01 | -6.46E-01 |

Table S7. Environmental impact results of the sensitivity analysis to measure the effects of using different reinforcing particles to enhance the properties of the biopolymer.

| Indicator                  | Solvent PHB | Solvent PHB-<br>aluminum | Solvent PHB-<br>cellulose | Solvent PHB-<br>clay | Solvent PHB-<br>graphene | Solvent PHB-<br>cellulose-<br>natural |
|----------------------------|-------------|--------------------------|---------------------------|----------------------|--------------------------|---------------------------------------|
| Fine particulate<br>matter | 0.0991      | 0.0991                   | 0.0998                    | 0.0991               | 0.0992                   | 0.0991                                |

|                                                     |           |           |           |           |           |           |
|-----------------------------------------------------|-----------|-----------|-----------|-----------|-----------|-----------|
| formation (kg PM2.5 eq)                             |           |           |           |           |           |           |
| Fossil resource scarcity (kg oil eq)                | 31.300    | 31.300    | 31.400    | 31.300    | 31.300    | 31.300    |
| Freshwater ecotoxicity ( kg 1.4-DCB)                | 2.790     | 2.790     | 2.810     | 2.790     | 2.790     | 2.790     |
| Freshwater eutrophication (kg P eq)                 | 0.0179    | 0.0179    | 0.0180    | 0.0179    | 0.0179    | 0.0179    |
| Global warming (kg CO2 eq)                          | 46.50     | 46.50     | 46.70     | 46.50     | 46.50     | 46.50     |
| Human carcinogenic toxicity (kg 1.4-DCB)            | 259.00    | 259.00    | 263.00    | 259.00    | 259.00    | 259.00    |
| Human non-carcinogenic toxicity (kg 1.4-DCB)        | 9670.00   | 9670.00   | 9760.00   | 9670.00   | 9670.00   | 9670.00   |
| Ionizing radiation ( kBq Co-60 eq)                  | 7.62      | 7.62      | 7.65      | 7.62      | 7.62      | 7.62      |
| Land use (m2a crop eq)                              | 0.9400    | 0.9400    | 0.9440    | 0.9400    | 0.9400    | 0.9400    |
| Marine ecotoxicity (kg 1.4-DCB)                     | 12400.0   | 12400.0   | 12500.0   | 12400.0   | 12400.0   | 12400.0   |
| Marine eutrophication (kg N eq)                     | 0.0013    | 0.0013    | 0.0013    | 0.0013    | 0.0013    | 0.0013    |
| Mineral resource scarcity (kg Cu eq)                | 0.1960    | 0.1960    | 0.2030    | 0.1970    | 0.1960    | 0.1960    |
| Ozone formation. Human health (kg NOx eq)           | 1.110     | 1.110     | 1.110     | 1.110     | 1.110     | 1.110     |
| Ozone formation. Terrestrial ecosystems (kg NOx eq) | 1.7200    | 1.7200    | 1.7200    | 1.7200    | 1.7200    | 1.7200    |
| Stratospheric ozone depletion (kg CFC11 eq)         | 0.0000358 | 0.0000358 | 0.0000359 | 0.0000358 | 0.0000358 | 0.0000358 |
| Terrestrial acidification (kg SO2 eq)               | 0.1870    | 0.1870    | 0.1880    | 0.1870    | 0.1870    | 0.1870    |

---

|                                            |        |        |        |        |        |        |
|--------------------------------------------|--------|--------|--------|--------|--------|--------|
| Terrestrial<br>ecotoxicity<br>(kg 1,4-DCB) | 3830.0 | 3830.0 | 3830.0 | 3830.0 | 3830.0 | 3830.0 |
| Water<br>consumption<br>(m3)               | 0.3360 | 0.3360 | 0.3380 | 0.3360 | 0.3360 | 0.3360 |

---
